# Supplementary material for: A tough and sustainable fiber-forming material from lignin and waste poly(ethylene terephthalate)
Source: PubMed Central journal article supplement (PMC9072396; doi:10.1039/c9ra07052d), 2019-10-01
Supplement: RA-009-C9RA07052D-s001.pdf [file RA-009-C9RA07052D-s001.pdf]

## SUPPORTING INFORMATION

### A tough and sustainable fiber-forming material from lignin and waste poly(ethylene terephthalate)

Kokouvi M. Akato,<sup>†,‡</sup> Ngoc A. Nguyen,<sup>§</sup> Kalavathy Rajan,<sup>†</sup> David P. Harper,<sup>†</sup> Amit K. Naskar<sup>\*,†,‡,§</sup>

<sup>†</sup>Center for Renewable Carbon, University of Tennessee, Knoxville, Tennessee 37996, United States

<sup>‡</sup>Bredesen Center for Interdisciplinary Research and Graduate Education, University of Tennessee, Knoxville, Tennessee 37996, United States

<sup>§</sup>Carbon and Composites Group, Chemical Sciences Division, Oak Ridge National Laboratory, Oak Ridge, Tennessee 37831, United States

\*Corresponding author: [naskarak@ornl.gov](mailto:naskarak@ornl.gov)

#### Detailed GPC Analysis

GPC was performed for both L and L<sub>HT</sub> lignins using a Tosoh EcoSEC gel permeation chromatography (GPC) system with a refractive index (RI) detector equipped with a flow reference cell. Prior to measurements, lignin was dissolved in THF at a concentration of 1 mg/mL and filtered using a 0.22 μm membrane. The instrument and reference cell flow rates were set to 0.35 mL/min and the analysis was performed at 40 °C. Sample injections of 10 μL were separated using two consecutive Tosoh TSKgel SuperMultiporeHZ-M analytical columns (4.6 mm I.D., 150 mm length, 5 μm particle size) and a TSKgel SuperMultiporeHZ-M guard column using a total run time of 15 min. Evaluation of the number-average molecular weight ( $M_n$ ), weight-average molecular weight ( $M_w$ ) and their ratio (PDI) was complete using in-house polystyrene standard curves in the range of 600-7.5×10<sup>6</sup> Da.

#### <sup>31</sup>P MNR

Table S1 Assignment of hydroxyl groups peaks in <sup>31</sup>P NMR spectroscopy.

| Sample name/ mmol per g lignin | Assignments, δ (ppm) |
|--------------------------------|----------------------|
| Aliphatic OH                   | 150-146              |
| S-OH condensed                 | 144.5-143.5          |
| S-OH non-condensed             | 143.5-142.25         |
| G-OH condensed                 | 142.25-141           |
| G-OH non-condensed             | 141-138.5            |
| H-OH                           | 138.5-136.5          |
| COOH                           | 136-133.5            |

2D  $^1\text{H}$ - $^{13}\text{C}$  HSQC NMR

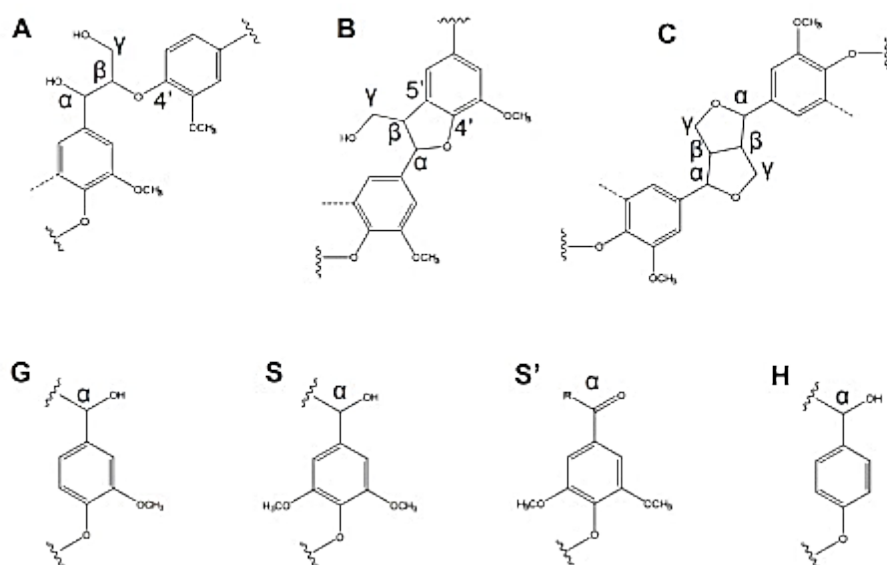

Figure S1. Lignin substructures detected by 2D HSQC NMR. (A)  $\beta$ -O-4'; (B)  $\beta$ -5' (phenylcoumaran structure); (C)  $\beta$ - $\beta'$  (resinol structures); (G) guaiacylpropane unit; (S) syringyl propane unit; (S') syringyl propane unit with carbonyl at C $\alpha$ ; (H) p-hydroxyphenolpropane unit [1].

Table S2. <sup>13</sup>C and <sup>1</sup>H assignments of the lignin signals in 2D HSQC spectra [2].

| Label                          | $\delta C/\delta H$ (ppm)             | Assignment                                                                                                 |
|--------------------------------|---------------------------------------|------------------------------------------------------------------------------------------------------------|
| B <sub>β</sub>                 | 53.1/3.4                              | C <sub>β</sub> -H <sub>β</sub> in phenylcoumaran substructures (B)                                         |
| C <sub>β</sub>                 | 53.5/3.1                              | C <sub>β</sub> -H <sub>β</sub> in β-β' resinol substructures (C)                                           |
| -OCH <sub>3</sub>              | 55.6/3.73                             | C-H in methoxyls                                                                                           |
| A <sub>γ</sub>                 | 59.4/3.4 and 3.7                      | C <sub>γ</sub> -H <sub>γ</sub> in γ- hydroxylated β-O- 4' substructures (A)                                |
| I <sub>γ</sub>                 | 61/4.1                                | C <sub>γ</sub> -H <sub>γ</sub> in cinnamyl alcohol end-groups (I)                                          |
| B <sub>γ</sub>                 | 63.4/3.6                              | C <sub>γ</sub> -H <sub>γ</sub> in phenylcoumaran substructures (B)                                         |
| Hk <sub>γ</sub>                | 67.5/4.2                              | C <sub>γ</sub> -H <sub>γ</sub> in Hibbert ketone structures <sup>b</sup>                                   |
| C <sub>γ</sub>                 | 71.2/4.2                              | C <sub>γ</sub> -H <sub>γ</sub> in β-β' resinol substructures (C) <sup>b</sup>                              |
| A <sub>α</sub>                 | 71.9/4.9                              | C <sub>α</sub> -H <sub>α</sub> in β-O-4' substructures (A)                                                 |
| X <sub>2</sub>                 | 73/3.1                                | C <sub>2</sub> -H <sub>2</sub> in xylan substructures (X)                                                  |
| X <sub>3</sub>                 | 74/3.3                                | C <sub>3</sub> -H <sub>3</sub> in xylan substructures (X)                                                  |
| X <sub>4</sub>                 | 75.7/3.5                              | C <sub>4</sub> -H <sub>4</sub> in xylan substructures (X)                                                  |
| A <sub>β</sub>                 | 80.4/4.5,<br>84.4/4.4<br>and 85.6/4.2 | C <sub>β</sub> -H <sub>β</sub> in β-O-4' substructures (A)                                                 |
| A <sub>oxβ</sub>               | 83/5.2                                | C <sub>β</sub> -H <sub>β</sub> in α-oxidized β-O-4' substructures (Aox)                                    |
| C <sub>α</sub>                 | 85.5/4.6                              | C <sub>α</sub> -H <sub>α</sub> in β-β' resinol substructures (C)                                           |
| B <sub>α</sub>                 | 87.7/5.5                              | C <sub>α</sub> -H <sub>α</sub> in phenylcoumaran substructures (B)                                         |
| T <sub>8</sub>                 | 94.4/6.6                              | C <sub>8</sub> -H <sub>8</sub> in triclin units (T)                                                        |
| T <sub>6</sub>                 | 99.5/66.2                             | C <sub>6</sub> -H <sub>6</sub> in triclin units (T)                                                        |
| T <sub>2,6</sub>               | 104.5/7.4                             | C <sub>2</sub> -H <sub>2</sub> and C <sub>6</sub> -H <sub>6</sub> in triclin units (T)                     |
| S <sub>2,6</sub>               | 104.2/6.7                             | C <sub>2</sub> -H <sub>2</sub> and C <sub>6</sub> -H <sub>6</sub> in syringyl units (S)                    |
| T <sub>3</sub>                 | 107/7.2                               | C <sub>3</sub> -H <sub>3</sub> in triclin units (T)                                                        |
| S' <sub>2,6</sub>              | 107.4/7.4                             | C <sub>2</sub> -H <sub>2</sub> and C <sub>6</sub> -H <sub>6</sub> in syringyl units with α oxidization(S') |
| G <sub>2</sub>                 | 110.2/6.9                             | C <sub>2</sub> -H <sub>2</sub> in guaiacyl units (G)                                                       |
| Fa <sub>2</sub>                | 111.5/7.3                             | C <sub>2</sub> -H <sub>2</sub> in ferulate (Fa)                                                            |
| G <sub>5</sub> /G <sub>6</sub> | 115/6.7 and<br>119.7/6.8              | C <sub>5</sub> -H <sub>5</sub> and C <sub>6</sub> -H <sub>6</sub> in guaiacyl units (G)                    |
| Fa <sub>6</sub>                | 123.1/7.1                             | C <sub>6</sub> -H <sub>6</sub> in ferulate (Fa)                                                            |
| HMF                            | 123.6/7.5                             | C <sub>3</sub> - H <sub>3</sub> in 5-O-substituted furfurals -like units                                   |
| St <sub>α,β</sub>              | 126.6/6.9                             | C <sub>α</sub> -H <sub>α</sub> and C <sub>β</sub> -H <sub>β</sub> in stilbene structures (St)              |
| H <sub>2,6</sub>               | 128.2/7.2                             | C <sub>2,6</sub> -H <sub>2,6</sub> in p-hydroxyphenyl units (H)                                            |
| I <sub>α</sub>                 | 130.6/6.3                             | C <sub>α</sub> -H <sub>α</sub> in cinnamyl alcohol end-groups (I)                                          |
| Pca <sub>2,6</sub>             | 130.1/7.5                             | C <sub>2</sub> -H <sub>2</sub> and C <sub>6</sub> -H <sub>6</sub> in p-coumarate (Pca)                     |
| Pb <sub>2,6</sub>              | 131.6/7.7                             | C <sub>2</sub> -H <sub>2</sub> and C <sub>6</sub> -H <sub>6</sub> in p-benzoate (Pb)                       |
| HMF                            | 179/9.6                               | C <sub>α</sub> -H <sub>α</sub> in 5-O-substituted furfurals -like units                                    |

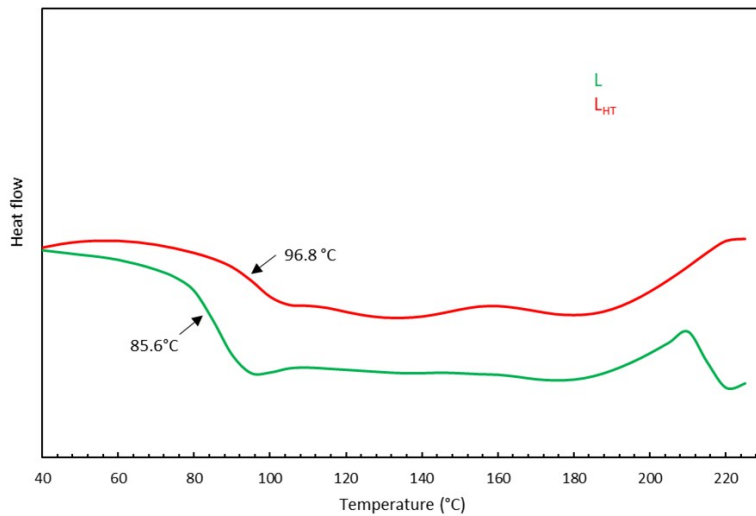

Figure S2 DSC thermograms of L and L<sub>HT</sub> in nitrogen atmosphere showing the glass transition temperatures ( $T_g$ ).

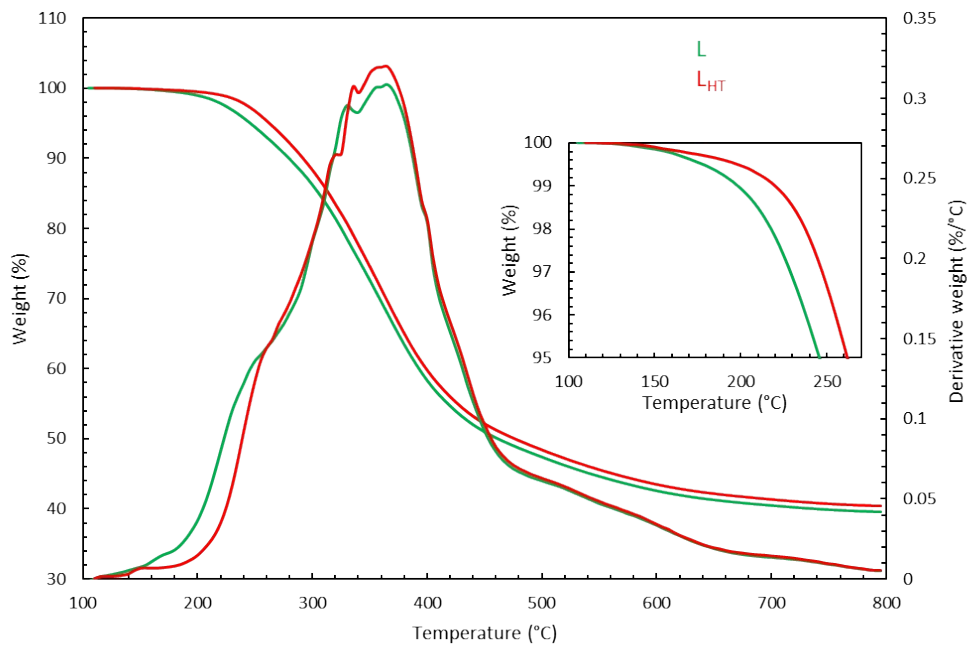

Figure S3. TGA and derivative weight thermograms of L and L<sub>HT</sub> in nitrogen atmosphere showing the effect of thermal treatment on lignin thermal stability.

Table S3 Thermal behavior temperatures, calorimetric values, and degree of crystallinity of PET and its lignin derived blends.

| Samples                              | T <sub>m</sub> (°C) <sup>a</sup> | ΔH <sub>m</sub> (J/g) <sup>a</sup> | T <sub>rec</sub> (°C) | ΔH <sub>rec</sub> (J/g) | X <sub>c</sub> (%) <sup>b</sup> | X <sub>c</sub> (%) <sup>a</sup> |
|--------------------------------------|----------------------------------|------------------------------------|-----------------------|-------------------------|---------------------------------|---------------------------------|
| PET                                  | 247                              | 46                                 | 208                   | 53                      | 57                              | 33                              |
| PET <sub>PL</sub>                    | 239                              | 41                                 | 202                   | 49                      | 23                              | 29                              |
| PET <sub>PL</sub> /10L               | 237                              | 33                                 | 209                   | 44                      | 23                              | 24                              |
| PET <sub>PL</sub> /20L               | 232                              | 32                                 | 203                   | 39                      | 31                              | 23                              |
| PET <sub>PL</sub> /30L               | 229                              | 29                                 | 198                   | 33                      | 30                              | 21                              |
| PET <sub>PL</sub> /10L <sub>HT</sub> | 236                              | 36                                 | 208                   | 41                      | 30                              | 26                              |
| PET <sub>PL</sub> /20L <sub>HT</sub> | 233                              | 29                                 | 203                   | 38                      | 23                              | 21                              |
| PET <sub>PL</sub> /30L <sub>HT</sub> | 231                              | 24                                 | 199                   | 32                      | 20                              | 17                              |

<sup>a</sup> Values obtained from second heating curves <sup>b</sup> Computed using first heating curves

The degree of crystallinity ( $\chi_c$ ) was computed using the first heating curves information and applying the following equation.

$$\chi_c = \frac{\Delta H_m}{W_f \times \Delta H_{100}} \times 100\% \quad (S1)$$

where  $\Delta H_m$  is the melting enthalpy from the first heating curve,  $W_f$  is the PET weight fraction in each composition and  $\Delta H_{100}$  is the theoretical fusion enthalpy of 100% crystalline PET (140 J/g) [3]

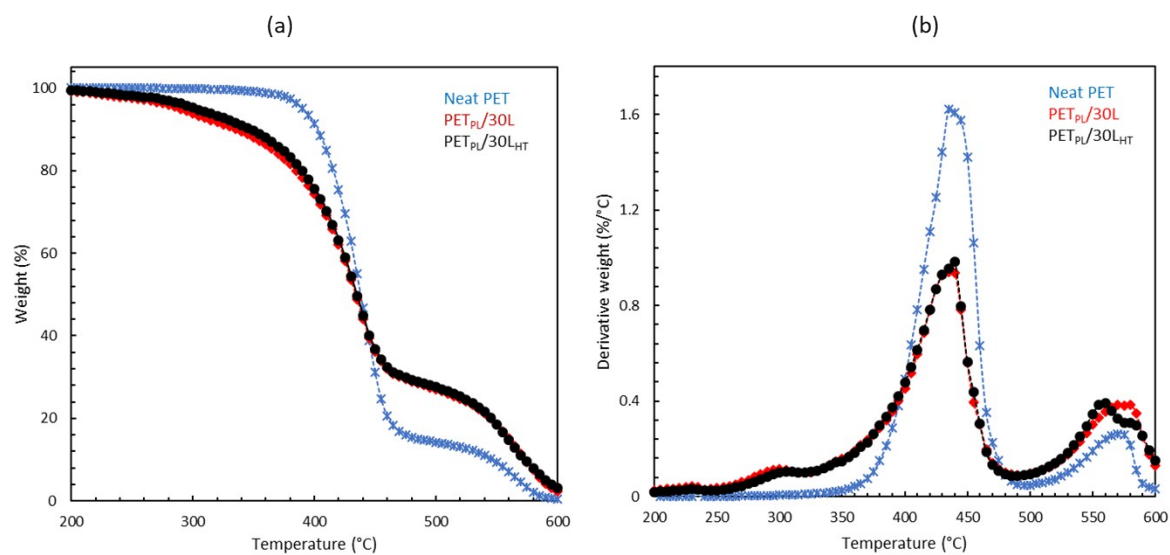

Figure S4. Thermal decomposition of PET and its lignin derived blends at 30 wt.% lignin contents in oxidative atmosphere at 20°C/min.

1. Nguyen, N.A., et al., *An Acrylonitrile–Butadiene–Lignin Renewable Skin with Programmable and Switchable Electrical Conductivity for Stress/Strain-Sensing Applications*. *Macromolecules*, 2018. **51**(1): p. 115-127.
2. Constant, S., et al., *New insights into the structure and composition of technical lignins: a comparative characterisation study*. *Green Chemistry*, 2016. **18**(9): p. 2651-2665.
3. Wunderlich, B. Chapter 2 - The basis of thermal analysis. In *Thermal Analysis*, Wunderlich, B., Ed.; Academic Press: 1990; pp 1-36.
